1 **Genotypic variability enhances the reproducibility of an ecological study**

2 Alexandru Milcu<sup>1,2</sup>, Ruben Puga-Freitas<sup>3</sup>, Aaron M. Ellison<sup>4,5</sup>, Manuel Blouin<sup>3,6</sup>, Stefan Scheu<sup>7</sup>,  
3 Thomas Girin<sup>8</sup>, Grégoire T. Freschet<sup>2</sup>, Laura Rose<sup>9</sup>, Michael Scherer-Lorenzen<sup>9</sup>, Sebastien  
4 Barot<sup>6</sup>, Jean-Christophe Lata<sup>10</sup>, Simone Cesarz<sup>11,12</sup>, Nico Eisenhauer<sup>11,12</sup>, Agnès Gigon<sup>3</sup>,  
5 Alexandra Weigelt<sup>11,12</sup>, Amandine Hansart<sup>13</sup>, Anna Greiner<sup>9</sup>, Anne Pando<sup>6</sup>, Arthur Gessler<sup>14,15</sup>,  
6 Carlo Grignani<sup>16</sup>, Davide Assandri<sup>16</sup>, Gerd Gleixner<sup>17</sup>, Jean-François Le Galliard<sup>10,13</sup>, Katherine  
7 Urban-Mead<sup>2</sup>, Laura Zavattaro<sup>16</sup>, Marina E.H. Müller<sup>14</sup>, Markus Lange<sup>18</sup>, Martin Lukac<sup>19,20</sup>,  
8 Michael Bonkowski<sup>17</sup>, Neringa Mannerheim<sup>21</sup>, Nina Buchmann<sup>21</sup>, Olaf Butenschoen<sup>7,22</sup>, Paula  
9 Rotter<sup>9</sup>, Rahme Seyhun<sup>19</sup>, Sebastien Devidal<sup>1</sup>, Zachary Kayler<sup>14,23</sup> and Jacques Roy<sup>1</sup>

10 <sup>1</sup>Ecotron (UPS-3248), CNRS, Campus Baillarguet, F-34980, Montferrier-sur-Lez, France.

11 <sup>2</sup>Centre d'Ecologie Fonctionnelle et Evolutive, CEFE-CNRS, UMR 5175, Université de  
12 Montpellier – Université Paul Valéry – EPHE, 1919 route de Mende, F-34293, Montpellier  
13 Cedex 5, France.

14 <sup>3</sup>Institut des Sciences de l'Ecologie et de l'Environnement de Paris (UPMC, UPEC, Paris Diderot,  
15 CNRS, IRD, INRA), Université Paris-Est Créteil, 61 avenue du Général De Gaulle, F-94010  
16 Créteil Cedex, France.

17 <sup>4</sup>Harvard Forest, Harvard University, 324 North Main Street, Petersham, Massachusetts, USA.

18 <sup>5</sup>University of the Sunshine Coast, Tropical Forests and People Research Centre, Locked Bag 4,  
19 Maroochydore DC, Queensland 4558, Australia.

20 <sup>6</sup>IRD, Institut des Sciences de l'Ecologie et de l'Environnement de Paris (UPMC, UPEC, Paris  
21 Diderot, CNRS, IRD, INRA), UPMC, Bâtiment 44-45, deuxième étage, bureau 208, CC 237, 4  
22 place Jussieu, 75252 Paris cedex 05, France.

23 <sup>7</sup>J.F. Blumenbach Institute for Zoology and Anthropology, Georg August University Göttingen,  
24 Berliner Str. 28, 37073 Göttingen, Germany.

25 <sup>8</sup>Institut Jean-Pierre Bourgin, INRA, AgroParisTech, CNRS, Université Paris-Saclay, RD10,  
26 78026 Versailles Cedex, France.

27 <sup>9</sup>Faculty of Biology, University of Freiburg, Geobotany, Schaezlestr. 1, D-79104 Freiburg,  
28 Germany.

29 <sup>10</sup>Institut des Sciences de l'Ecologie et de l'Environnement de Paris (UPMC, UPEC, Paris  
30 Diderot, CNRS, IRD, INRA), Sorbonne Universités, CC 237, 4 place Jussieu, 75252 Paris cedex  
31 05, France.

32 <sup>11</sup>German Centre for Integrative Biodiversity Research (iDiv), Halle-Jena-Leipzig, Deutscher  
33 Platz 5e, 04103 Leipzig, Germany.

34 <sup>12</sup>Institute of Biology, Leipzig University, Johannisallee 21, 04103 Leipzig, Germany.

35 <sup>13</sup>Ecole normale supérieure, PSL Research University, Département de biologie, CNRS, UMS  
36 3194, Centre de recherche en écologie expérimentale et prédictive (CEREPEP-Ecotron  
37 IleDeFrance), 78 rue du château, 77140 Saint-Pierre-lès-Nemours, France.

38 <sup>14</sup>Leibniz Centre for Agricultural Landscape Research (ZALF), Institute of Landscape  
39 Biogeochemistry, Eberswalder Str. 84, 15374 Müncheberg, Germany.

40 <sup>15</sup>Swiss Federal Research Institute WSL, Zürcherstr. 111, 8903 Birmensdorf, Switzerland.

41 <sup>16</sup>Department of Agricultural, Forest and Food Sciences, University of Turin, largo Braccini, 2,  
42 10095 Grugliasco, Italy.

43 <sup>17</sup>Department of Terrestrial Ecology, Institute for Zoology, University of Cologne, Zùlpicher Str.  
44 47b, 50674 Köln, Germany.

45 <sup>18</sup>Max Planck Institute for Biogeochemistry, Postfach 100164, 07701 Jena, Germany.

46 <sup>19</sup>School of Agriculture, Policy and Development, University of Reading, Reading, RG6 6AR,  
47 UK.

48 <sup>20</sup>FLD, Czech University of Life Sciences, 165 00 Prague, Czech Republic.

49 <sup>21</sup>Institute of Agricultural Sciences, ETH Zurich, Universitätsstrasse 2, 8092 Zürich, Switzerland

50 <sup>22</sup>Senckenberg Biodiversität und Klima Forschungszentrum BiK-F, Georg-Voigt-Straße 14-16,  
51 Frankfurt am Main.

52 <sup>23</sup>Department of Soil and Water Systems, University of Idaho, 875 Perimeter Dr., Moscow, ID,  
53 USA.

54

55 **Corresponding author:** Alexandru Milcu, CNRS, Ecotron - UPS 3248, Campus Baillarguet, 34980,

56 Montferrier-sur-Lez, France, email: alex.milcu@cnsr.fr, phone: +33 (0) 434-359-893.

57 **Many scientific disciplines currently are experiencing a “reproducibility crisis” because**  
58 **numerous scientific findings cannot be repeated consistently. A novel but controversial**  
59 **hypothesis postulates that stringent levels of environmental and biotic standardization in**  
60 **experimental studies reduces reproducibility by amplifying impacts of lab-specific**  
61 **environmental factors not accounted for in study designs. A corollary to this hypothesis is**  
62 **that the deliberate introduction of controlled systematic variability (CSV) in experimental**  
63 **designs can increase reproducibility. We tested this hypothesis using a multi-laboratory**  
64 **microcosm study in which the same ecological experiment was repeated in 14 laboratories**  
65 **across Europe. Each laboratory introduced environmental and genotypic CSV within and**  
66 **among replicated microcosms established in either growth chambers (with stringent**  
67 **control of environmental conditions) or glasshouses (with more variable environmental**  
68 **conditions). The introduction of genotypic CSV led to lower among-laboratory variability**  
69 **in growth chambers, indicating increased reproducibility, but had no significant effect in**  
70 **glasshouses where reproducibility also was lower. Environmental CSV had little effect on**  
71 **reproducibility. Although there are multiple causes for the “reproducibility crisis”,**  
72 **deliberately including genetic variation may be a simple solution for increasing the**  
73 **reproducibility of ecological studies performed in controlled environments.**

74

75       Reproducibility—the ability to duplicate a study and its findings—is a defining feature of  
76 scientific research. In ecology, it is often argued that it is virtually impossible to accurately  
77 duplicate any single ecological experiment or observational study. The rationale is that the  
78 complex ecological interactions between the ever-changing environment and the extraordinary  
79 diversity of biological systems exhibiting a wide range of plastic responses at different levels of

80 biological organization make exact duplication unfeasible<sup>1,2</sup>. Although this may be true for  
81 observational and field studies, numerous ecological (and agronomic) studies are carried out with  
82 artificially assembled simplified ecosystems and controlled environmental conditions in  
83 experimental microcosms or mesocosms (henceforth, “microcosms”)<sup>3–5</sup>. Since biotic and  
84 environmental parameters can be tightly controlled in microcosms, results from such studies  
85 should be easier to reproduce. Even though microcosms have frequently been used to address  
86 fundamental ecological questions<sup>4,6,7</sup>, there has been no quantitative assessment of the  
87 reproducibility of any microcosm experiment.

88 Experimental standardization—the implementation of strictly defined and controlled  
89 properties of organisms and their environment—is widely thought to increase both  
90 reproducibility and sensitivity of statistical tests<sup>8,9</sup> because it reduces within-treatment  
91 variability. This paradigm has been recently challenged by several studies on animal behavior,  
92 suggesting that stringent standardization may, counterintuitively, be responsible for generating  
93 non-reproducible results<sup>9–11</sup> and contribute to the actual reproducibility crisis<sup>12–15</sup>; the results  
94 may be valid under given conditions (i.e., they are local “truths”) but are not generalizable<sup>8,16</sup>.  
95 Despite rigorous adherence to experimental protocols, laboratories inherently vary in many  
96 conditions that are not measured and are thus unaccounted for, such as experimenter, micro-scale  
97 environmental heterogeneity, physico-chemical properties of reagents and lab-ware, pre-  
98 experimental conditioning of organisms, and their genetic and epigenetic background. It even has  
99 been suggested that attempts to stringently control all sources of biological and environmental  
100 variation might inadvertently lead to the amplification of the effects of these unmeasured  
101 variations among laboratories, thus reducing reproducibility<sup>9–11</sup>.

102           Some studies have gone even further, hypothesizing that the introduction of controlled  
103 systematic variation (CSV) among the replicates of a treatment (e.g., using different genotypes or  
104 varying the organisms' pre-experimental conditions among the experimental replicates) should  
105 lead to less variable mean response values between the laboratories that duplicate the  
106 experiments<sup>9,11</sup>. In short, it has been argued that reproducibility should increase by shifting the  
107 variance from among experiments to within them<sup>9</sup>. If true, then introducing CSV will increase  
108 researchers' ability to draw generalizable conclusions about the directions and effect sizes of  
109 experimental treatments and reduce the probability of false positives. The trade-off to this  
110 approach is that increasing within-experiment variability will reduce the sensitivity (i.e. the  
111 probability of detecting true positives) of statistical tests. However, it currently remains unclear  
112 whether introducing CSV increases reproducibility of ecological microcosm experiments, and if  
113 so, at what cost for the sensitivity of statistical tests.

114           To test the hypothesis that introducing CSV enhances reproducibility in an ecological  
115 context, we had 14 European laboratories simultaneously run a simple microcosm experiment  
116 using grass (*Brachypodium distachion* L.) monocultures and grass and legume (*Medicago*  
117 *truncatula* Gaertn.) mixtures. As part of the reproducibility experiment, the 14 laboratories  
118 independently tested the hypothesis that the presence of the legume species *M. truncatula* in  
119 mixtures would lead to higher total microcosms plant productivity and enhanced growth of the  
120 non-legume *B. distachion* via rhizobia-mediated nitrogen fertilization and/or nitrogen sparing  
121 effects<sup>17-19</sup>.

122           All laboratories were provided with the same experimental protocol, seed stock from the  
123 same batch, and identical containers in which to establish microcosms with grass only and grass-  
124 legume mixtures. Alongside a control (CTR) with no CSV and containing a homogenized soil

125 substrate (mixture of soil and sand) and a single genotype of each plant species, we explored the  
126 effects of five different types of within- and among-microcosm CSV on experimental  
127 reproducibility of the legume effect (Fig. 1): 1) within-microcosm environmental CSV (ENV<sub>W</sub>)  
128 achieved by spatially varying soil resource distribution through the introduction of six sand  
129 patches into the soil; 2) among-microcosm environmental CSV (ENV<sub>A</sub>), which varied the  
130 number of sand patches (none, three or six) among replicate microcosms; 3) within-microcosm  
131 genotypic CSV (GEN<sub>W</sub>) that used three distinct genotypes per species planted in homogenized  
132 soil in each microcosm; 4) among-microcosm genotypic CSV (GEN<sub>A</sub>) that varied the number of  
133 genotypes (one, two or three) planted in homogenized soil among replicate microcosms; and 5)  
134 both genotypic and environmental CSV (GEN<sub>W</sub>+ENV<sub>W</sub>) within microcosms that used six sand  
135 patches and three plant genotypes per species in each microcosm. In addition, we tested whether  
136 CSV effects depended on the level of standardization within laboratories by using two common  
137 experimental approaches ('SETUP' hereafter): growth chambers with tightly controlled  
138 environmental conditions and identical soil (eight laboratories) or glasshouses with more loosely  
139 controlled environmental conditions and different soils (six laboratories; see Supplementary  
140 Table 1 for the physicochemical properties of the soils).

141 As response variables we measured 12 parameters representing a typical ensemble of  
142 variables measured in plant-soil microcosm experiments. Six of these measured at the  
143 microcosm-level: shoot biomass, root biomass, total biomass, shoot to root ratio,  
144 evapotranspiration and decomposition of a common substrate using a simplified version of the  
145 "teabag litter decomposition method"<sup>20</sup>. The other six were measured on the *B. distachyon* grass  
146 species: seed biomass, height and shoot tissue chemistry including N%, C%,  $\delta^{15}\text{N}$ ,  $\delta^{13}\text{C}$ . All 12  
147 variables were then used to calculate the effect of the presence of a nitrogen-fixing legume on

148 ecosystem functions in grass-legume mixtures ('net legume effect' hereafter) (Supplementary  
149 Table 2) calculated as the difference between the values measured in the microcosms with and  
150 without legumes, an approach often used in legume-grass binary cropping systems<sup>19,21</sup> and  
151 biodiversity-ecosystem function experiments<sup>17,22</sup>.

152 Because we considered that statistically significant differences among the 14 laboratories  
153 would indicate a lack of reproducibility, we first assessed how our experimental treatments (CSV  
154 and SETUP) affected the number of laboratories that produced results that could be considered to  
155 have reproduced the same finding. We then determined how experimental treatments affected  
156 standard deviation (SD) of the legume effect for each of the 12 variables both within- and  
157 among-laboratories; lower among-laboratory SD implies that the results were reproduced more  
158 closely. Lastly, we explored the relationship between within- and among-laboratory SD as well  
159 as how the experimental treatments affected the statistical power of detecting the net legume  
160 effect.

161 Although each laboratory followed the same experimental protocol, we found a remarkably  
162 high level of among-laboratory variation for the majority of response variables (Supplementary  
163 Fig. 1) and the net legume effect on those variables (Fig. 2). For example, the net legume effect  
164 on mean total plant biomass varied among laboratories from 1.31 to 6.72 g dry weight (DW) per  
165 microcosm in growth chambers, suggesting that unmeasured laboratory-specific conditions  
166 outweighed effects of experimental standardization. Among glasshouses, differences were even  
167 larger: the legume effect on the mean plant biomass varied by two orders of magnitude, from  
168 0.14 to 14.57g DW per microcosm (Fig. 2). Furthermore, for half of variables (for root biomass,  
169 litter decomposition, grass height, foliar C%,  $\delta^{15}\text{C}$ ,  $\delta^{15}\text{N}$ ) the direction of the net legume effect  
170 varied with laboratory.

171 Mixed-effects models testing the effect of the presence of legume species (LEG), laboratory  
172 (LAB), CSV, and their interactions (with experimental block—within-LAB growth chamber or  
173 glasshouse bench—as a random factor) on the 12 response variables revealed that for half of the  
174 variables the impact of the presence of legumes varied significantly with laboratory and CSV as  
175 indicated by the LEG×LAB×CSV three-way interaction (Table 1, Supplementary Figs 2 and 3).  
176 For the other half, significant two-way interactions between LEG×LAB and CSV×LAB were  
177 found. The same significant interactions were found for the analyses done on the first (PC1) and  
178 second (PC2) principal components from principal component PCA analysis that included all 12  
179 response variables, which together explained 45% of the variation (Table 1; Supplementary Fig.  
180 4ab). Taken together, these results suggest that the effect size and/or direction of the net legume  
181 effect was significantly different (i.e. not reproducible) in some laboratories and that the  
182 introduced CSV treatment affected reproducibility. In a complementary analysis including the  
183 SETUP in the model (and accounting for the LAB effect as a random factor), we found that the  
184 impact of the CSV treatment varied significantly with the SETUP (CSV×SETUP or  
185 LEG×CSV×SETUP interactions; Supplementary Table 3), suggesting the reproducibility of the  
186 results was different between glasshouses and growth chambers.

187 To answer the question of how many laboratories produced results that were statistically  
188 indistinguishable from one another (i.e. reproduced the same finding), we used Tukey's post-hoc  
189 Honest Significant Difference (HSD) test for the LAB effect on the first and second principal  
190 components describing the net legume effect, which together explained 49% of the variation  
191 (Supplementary Fig. 4cd). Out of 14 laboratories, seven (PC1) or 11 (PC2) laboratories were  
192 statistically indistinguishable for controls; this value increased with either environmental or  
193 genotypic CSV for PC1 but not PC2 (Table 2). When we analyzed responses in growth chambers



194 alone, five of eight laboratories were statistically indistinguishable for the control, but this  
195 increased to six out of eight in treatments with environmental CSV only and seven of eight in  
196 treatments with genotypic CSV ( $GEN_W$ ,  $GEN_A$  and  $GEN_W+ENV_W$ ). In glasshouses, introducing  
197 CSV did not affect the number of statistically indistinguishable laboratories with respect to PC1  
198 but decreased the number of statistically indistinguishable laboratories with respect to PC2  
199 (Table 2).

200 We further assessed the impact of the experimental treatments on the among- and within-  
201 laboratory SD. Analysis of the among-laboratory SD of the net legume effect revealed a  
202 significant CSV×SETUP interaction ( $F_{5,121}=7.38$ ,  $P < 0.001$ ) (Fig. 3a, b). This interaction  
203 included significantly lower fitted coefficients (i.e., lower among-laboratory SD) in growth  
204 chambers for  $GEN_W$  ( $t_{5,121} = -3.37$ ,  $P = 0.001$ ),  $GEN_A$  ( $t_{5,121} = -2.95$ ,  $P = 0.004$ ) and  
205  $ENV_W+GEN_W$  ( $t_{1,121} = -3.73$ ,  $P < 0.001$ ) treatments relative to CTR (see also Supplementary  
206 Note for full model output). For these three treatments, the among-laboratory SD of the net  
207 legume effect was 31.7% lower with genotypic CSV than without it, indicating increased  
208 reproducibility (Fig. 3a). The same analysis performed on within-laboratory SD of the net  
209 legume effect only found a slight but significant increase of within-laboratory SD in the  $GEN_A$   
210 treatment ( $t_{5,121} = 3.52$ ,  $P < 0.001$ ) (Supplementary Note). We then tested whether there was a  
211 relationship between within- and among-laboratory SD with a statistical model for among-  
212 laboratory SD as a function of within-laboratory SD, SETUP, CSV and their interactions. We  
213 found a significant within-laboratory SD×SETUP×CSV three-way interaction ( $F_{5,109} = 2.4$ ,  $P <$   
214  $0.040$ ) affecting among-laboratory SD (Supplementary Note). This interaction was the result of a  
215 more negative relationship between within- and among-laboratory SD in glasshouses relative to  
216 growth chambers, but with different slopes for the different CSV treatments (Fig. 4).

217 As we observed a tendency for CSV to increase within-laboratory variation (see  
218 Supplementary Note), we also analyzed the impact of the three CSV treatments that produced the  
219 most similar results ( $GEN_w$ ,  $GEN_A$ ,  $ENV_w+GEN_w$ ) on the statistical power of detecting the net  
220 legume effect within individual laboratories. In growth chambers, adding genotypic CSV led to a  
221 slight reduction in statistical power relative to CTR (57% in CTR vs. 46% in the three treatments  
222 containing genotypic variability) that could have been compensated for by using eleven instead  
223 of six replicated microcosms per treatment. In glasshouses, owing to a higher effect size of the  
224 impact of the presence of legumes on the response variables, the statistical power for detecting  
225 the legume effect in CTR was slightly higher (68%) than in growth chambers, but was reduced to  
226 51% on average for the three treatments containing genotypic CSV, a decrease that could have  
227 been compensated for by using 16 replicated microcosms instead of six.

228 Our findings provide compelling support for the hypothesis that introducing genotypic CSV  
229 in experimental designs can increase reproducibility of ecological studies<sup>9-11</sup>. However, the  
230 effectiveness of genotypic CSV for enhancing reproducibility varied with the setup as it only led  
231 to lower among-laboratory SD in growth chambers, not in glasshouses. Lower among-laboratory  
232 SD in growth chambers implies that the microcosms containing genotypic CSV were less  
233 strongly affected by unaccounted-for lab-specific environmental or biotic variables. Analyses  
234 performed at the level of individual variables (Table 1) showed that introducing genotypic CSV  
235 affected the among-laboratory SD in most but not all variables. This suggests that the  
236 relationship between genotypic CSV and reproducibility is probabilistic and results from the  
237 decreased likelihood that microcosms containing CSV will respond to unaccounted for lab-  
238 specific environmental factors in the same direction and with the same magnitude. The  
239 mechanism is likely to be analogous to the stabilizing biodiversity effect on ecosystem functions

240 under changing environmental conditions<sup>23–26</sup>, but additional empirical evidence is needed to  
241 confirm this conjecture.

242 Introducing genotypic CSV increased reproducibility in growth chambers but not in  
243 glasshouses. Higher among-laboratory SD in glasshouses may indicate the existence therein of  
244 stronger laboratory-specific factors, and our deliberate use of different soils in the glasshouses  
245 presumably contributed to this effect. However, the among-laboratory SD in glasshouses  
246 decreased with increasing within-laboratory SD, irrespective of CSV, an effect that was less  
247 clear in growth chambers (Fig. 4). This observation is in line with the hypothesis put forward by  
248 Richter et al.<sup>9</sup> that increasing the variance within experiments can reduce the among-laboratory  
249 variability of the mean effect sizes observed in each laboratory. However, the within-laboratory  
250 variability induced by the CSV treatments in glasshouses had no significant effect on among-  
251 laboratory variability, suggesting that our CSV treatments did not introduce sufficient within-  
252 microcosm variability to buffer against laboratory-specific factors for all response variables. This  
253 finding is in accordance with the two studies that explored the role of CSV for reproducibility in  
254 animal behavior and recommended the use of within-laboratory heterogenization to increase the  
255 likelihood of reproducibility of results across laboratories varying in experimental conditions<sup>9,10</sup>.

256 Our results also indicated that genotypic CSV was more effective in increasing  
257 reproducibility than environmental CSV, irrespective of whether the CSV was introduced within  
258 or among individual replicates (i.e., microcosms). However, we cannot discount the possibility  
259 that we found this result because our treatments with environmental CSV were less successful in  
260 increasing within-microcosm variability. Additional experiments could test whether other types  
261 of environmental CSV, such as soil nutrients, texture, or water availability, might be more  
262 effective at increasing reproducibility.

263 We expected higher overall productivity (i.e., a net legume effect) in the grass-legume  
264 mixtures and enhanced growth of *B. distachyon* because of the presence of the nitrogen (N)-  
265 fixing *M. truncatula*. However, these species were not selected because of their routine pairings  
266 in agronomic or ecological experiments (they are rarely used that way), but rather because they  
267 are frequently used in controlled environment experiments for functional genomics. Contrary to  
268 our expectation, and despite the generally lower  $^{15}\text{N}$  signature of *B. distachyon* in the presence of  
269 N-fixing *M. truncatula* (suggesting that some of the N fixed by *M. truncatula* was taken up by  
270 the grass), the biomass of *B. distachyon* was lower in the microcosms containing *M. truncatula*.  
271 Seed mass and shoot %N data of *B. distachyon* was lower in mixtures (Supplementary Fig. 1),  
272 suggesting that the two species competed for N. The lack of a significant N fertilization effect of  
273 *M. truncatula* on *B. distachyon* could have resulted from the asynchronous phenologies of the  
274 two species: the 8-10-week life cycle of *B. distachyon* may have been too short to benefit from  
275 the N fixation by *M. truncatula*. Whereas the direction of the legume effects were the same in the  
276 majority of laboratories, in 10% of the 168 laboratory  $\times$  variable combinations (14 laboratories  $\times$   
277 12 response variables) the direction differed from the among-laboratory consensus (Fig. 2).

278 Because well-established meta-analytical approaches can account for variation caused by  
279 local factors and still detect the general trends across different types of experimental setups,  
280 environments, and populations, we should ask whether the additional effort required for  
281 introducing CSV in experiments is worthwhile. Considering the current reproducibility crisis in  
282 many fields of science<sup>27</sup>, we suggest that it is, for at least three reasons. First, some studies  
283 become seminal without any attempts to reproduce them. Second, even if a seminal study that is  
284 flawed due to laboratory-specific biases is later proven wrong, it usually takes significant time  
285 and resources before its impact on the field abates. Third, the current rate of reproducibility is

286 estimated to be as low as one-third<sup>12–14</sup>, implying that most data entering any meta-analysis are  
287 biased by unknown lab-specific factors. Addition of genotypic CSV may enhance the  
288 reproducibility of individual experiments and eliminate potential biases in data used in meta-  
289 analyses. Furthermore, if each individual study is less affected by laboratory-specific unknown  
290 environmental and biotic factors, then we would also need fewer studies to draw solid  
291 conclusions about the generality of phenomena. Therefore, we argue that investing more in  
292 making individual studies more reproducible and generalizable will be beneficial in both the  
293 short and long run. At the same time, adding CSV can reduce statistical power to detect  
294 experimental effects, so some additional experimental replicates would be needed when using it.

295 Overall, our study shows that results produced by microcosm experiments can be strongly  
296 affected by lab-specific factors. Although there are multiple causes for the reproducibility  
297 crisis<sup>15,27,28</sup>, deliberately including genetic variation in the studied organisms can be a simple  
298 solution for increasing the reproducibility of ecological studies performed in controlled  
299 environments. As the introduced genotypic variability only increased reproducibility in  
300 experimental setups with tightly controlled environmental conditions (i.e., in growth chambers  
301 using identical soil), future studies are needed to test whether the introduction of stronger sources  
302 of controlled within-laboratory variability can increase reproducibility in glasshouses with more  
303 loosely controlled environmental conditions and different soils.

304

## 305 **References**

- 306 1. Cassey, P. & Blackburn, T. Reproducibility and Repeatability in Ecology. *Bioscience* **56**,  
307 958–9 (2006).
- 308 2. Ellison, A. M. Repeatability and transparency in ecological research. *Ecology* **91**, 2536–

- 309 2539 (2010).
- 310 3. Lawton, J. H. The Ecotron facility at Silwood Park: the value of 'big bottle' experiments.  
311 *Ecology* **77**, 665–669 (1996).
- 312 4. Benton, T. G., Solan, M., Travis, J. M. & Sait, S. M. Microcosm experiments can inform  
313 global ecological problems. *Trends Ecol. Evol.* **22**, 516–521 (2007).
- 314 5. Drake, J. M. & Kramer, A. M. Mechanistic analogy: how microcosms explain nature.  
315 *Theor. Ecol.* **5**, 433–444 (2012).
- 316 6. Fraser, L. H. & Keddy, P. The role of experimental microcosms in ecological research.  
317 *Trends Ecol. Evol.* **12**, 478–481 (1997).
- 318 7. Srivastava, D. S. *et al.* Are natural microcosms useful model systems for ecology? *Trends*  
319 *Ecol. Evol.* **19**, 379–384 (2004).
- 320 8. De Boeck, H. J. *et al.* Global change experiments: challenges and opportunities.  
321 *Bioscience* (2015). doi:10.1093/biosci/biv099
- 322 9. Richter, S. H. *et al.* Effect of population heterogenization on the reproducibility of mouse  
323 behavior: a multi-laboratory study. *PLoS One* **6**, e16461 (2011).
- 324 10. Richter, S. H., Garner, J. P. & Würbel, H. Environmental standardization: cure or cause of  
325 poor reproducibility in animal experiments? *Nat. Methods* **6**, 257–261 (2009).
- 326 11. Richter, S. H., Garner, J. P., Auer, C., Kunert, J. & Würbel, H. Systematic variation  
327 improves reproducibility of animal experiments. *Nat. Methods* **7**, 167–8 (2010).
- 328 12. Massonnet, C. *et al.* Probing the reproducibility of leaf growth and molecular phenotypes:  
329 a comparison of three Arabidopsis accessions cultivated in ten laboratories. *Plant Physiol.*  
330 **152**, 2142–2157 (2010).
- 331 13. Begley, C. G. & Ellis, M. L. Raise standards for preclinical cancer research. *Nature* **483**,

- 332 531–533 (2012).
- 333 14. Open Science Collaboration. Estimating the reproducibility of psychological science.  
334 *Science* (80-. ). **349**, aac4716 (2015).
- 335 15. Parker, T. H. *et al.* Transparency in ecology and evolution: real problems, real solutions.  
336 *Trends Ecol. Evol.* **31**, 711–719 (2016).
- 337 16. Moore, R. P. & Robinson, W. D. Artificial bird nests, external validity, and bias in  
338 ecological field studies. *Ecology* **85**, 1562–1567 (2004).
- 339 17. Temperton, V. M., Mwangi, P. N., Scherer-Lorenzen, M., Schmid, B. & Buchmann, N.  
340 Positive interactions between nitrogen-fixing legumes and four different neighbouring  
341 species in a biodiversity experiment. *Oecologia* **151**, 190–205 (2007).
- 342 18. Meng, L. *et al.* Arbuscular mycorrhizal fungi and rhizobium facilitate nitrogen uptake and  
343 transfer in soybean/maize intercropping system. *Front. Plant Sci.* **6**, 339 (2015).
- 344 19. Sleugh, B., Moore, K. J., George, J. R. & Brummer, E. C. Binary Legume–Grass Mixtures  
345 Improve Forage Yield, Quality, and Seasonal Distribution. *Agron. J.* **92**, 24–29 (2000).
- 346 20. Keuskamp, J. a., Dingemans, B. J. J., Lehtinen, T., Sarneel, J. M. & Hefting, M. M. Tea  
347 Bag Index: a novel approach to collect uniform decomposition data across ecosystems.  
348 *Methods Ecol. Evol.* **4**, 1070–1075 (2013).
- 349 21. Nyfeler, D., Huguenin-Elie, O., Suter, M., Frossard, E. & Lüscher, A. Grass-legume  
350 mixtures can yield more nitrogen than legume pure stands due to mutual stimulation of  
351 nitrogen uptake from symbiotic and non-symbiotic sources. *Agric. Ecosyst. Environ.* **140**,  
352 155–163 (2011).
- 353 22. Suter, M. *et al.* Nitrogen yield advantage from grass-legume mixtures is robust over a  
354 wide range of legume proportions and environmental conditions. *Glob. Chang. Biol.* **21**,

- 355 2424–2438 (2015).
- 356 23. Loreau, M. & de Mazancourt, C. Biodiversity and ecosystem stability: A synthesis of  
357 underlying mechanisms. *Ecol. Lett.* **16**, 106–115 (2013).
- 358 24. Reusch, T. B., Ehlers, A., Hämmerli, A. & Worm, B. Ecosystem recovery after climatic  
359 extremes enhanced by genotypic diversity. *Proc. Natl. Acad. Sci. U. S. A.* **102**, 2826  
360 (2005).
- 361 25. Hughes, A. R., Inouye, B. D., Johnson, M. T. J., Underwood, N. & Vellend, M. Ecological  
362 consequences of genetic diversity. *Ecol. Lett.* **11**, 609–623 (2008).
- 363 26. Prieto, I. *et al.* Complementary effects of species and genetic diversity on productivity and  
364 stability of sown grasslands. *Nat. Plants* **1**, 1–5 (2015).
- 365 27. Baker, M. 1,500 scientists lift the lid on reproducibility. *Nature* **533**, 452–454 (2016).
- 366 28. Nuzzo, R. How scientists fool themselves – and how they can stop. *Nature* **526**, 182–185  
367 (2015).

368

## 369 **Acknowledgements**

370 This study benefited from the CNRS human and technical resources allocated to the  
371 ECOTRONS Research Infrastructures and the state allocation 'Investissement d'Avenir' ANR-  
372 11-INBS-0001 as well as from financial support by the ExpeER (grant no. 262060) consortium  
373 funded under the EU-FP7 research program (FP2007-2013). *Brachypodium* seeds were kindly  
374 provided by Richard Sibout (Observatoire du Végétal, Institut Jean-Pierre Bourgin, F-78026  
375 Versailles Cedex France) and *Medicago* seeds were supplied by Jean-Marie Prosperi (INRA  
376 Biological Resource Centre, F-34060 Montpellier Cedex 1, France). We further thank Jean  
377 Varale, Gesa Hoffmann, Paul Werthenbach, Oliver Ravel, Clement Piel and Damien Landais for



378 assistance throughout the study. For additional acknowledgements see Supplementary  
379 Information.

### 380 **Author contributions**

381 A.M. and J.R. designed the study with input from M.B, S.B and J-C.L. Substantial methodological  
382 contributions were provided by M.B., S.S., T.G., L.R. and M.S-L. Conceptual feedback on an early  
383 version was provided by G.F., N.E., J.R. and A.M.E. Data were analysed by A.M. with input from  
384 A.M.E. A.M. wrote the manuscript with input from all co-authors. All co-authors were involved  
385 in carrying out the experiments and/or analyses.

### 386 **Author Information**

387 The authors declare no conflict of interest. Correspondence and request for materials should be  
388 addressed to A.M. ([alex.milcu@cnr.fr](mailto:alex.milcu@cnr.fr)).

389

## 390 **METHODS**

391 All laboratories tried to the best of their abilities to carry out an identical experimental protocol.  
392 Whereas not all laboratories managed to recreate precisely all details of the experimental  
393 protocol, we considered this to be a realistic scenario under which ecological experiments using  
394 microcosms are performed in glasshouses and growth chambers.

### 395 **Germination**

396 The seeds from the three genotypes of *Brachypodium distachyon* (Bd21, Bd21-3 and Bd3-1) and  
397 *Medicago truncatula* (L000738, L000530 and L000174) were first sterilized by soaking 100  
398 seeds in 100 mL of a sodium hypochlorite solution with 2.6% active chlorine, and stirred for 15  
399 min using a magnet. Thereafter, the seeds were rinsed 3 times in 250 mL of sterile water for 10-

400 20 seconds under shaking. Sterilized seeds were germinated in trays (10 cm deep) filled with  
401 vermiculite. The trays were kept at 4°C in the dark for three days before being moved to light  
402 conditions (300  $\mu\text{mol m}^{-2} \text{s}^{-1}$  PAR) and 20/16°C and 60/70% air RH for day- and night-time,  
403 respectively. When the seedlings of both species reached 1 cm in height above the vermiculite,  
404 they were transplanted into the microcosms.

#### 405 **Preparation of microcosms**

406 All laboratories used identical containers (2-liter volume, 14.8-cm diameter, 17.4-cm height).  
407 Sand patches were created using custom-made identical “patch makers” consisting of six rigid  
408 PVC tubes (2.5 cm in diameter and 25 cm long), arranged in a circular pattern with an outer  
409 diameter of 10 cm. A textile mesh was placed at the bottom of the containers to prevent the  
410 spilling of soil through drainage holes. Filling of microcosms containing sand patches started  
411 with the insertion of the empty tubes into the containers. Thereafter, in growth chambers, 2000-g  
412 dry-weight of soil, subtracting the weight of the sand patches, was added into the containers and  
413 around the “patch maker” tubes. Because different soils were used in the glasshouses, the dry  
414 weight of the soil differed depending on the soil density and was first estimated individually in  
415 each laboratory as the amount of soil needed to fill the pots up to 2 cm from the top. After the  
416 soil was added to the containers, the tubes were filled with a mixture of 10% soil and 90% sand.  
417 When the microcosms did not contain sand patches, the amount of sand otherwise contained in  
418 the six patches was homogenized with the soil. During the filling of the microcosms, a common  
419 substrate for measuring litter decomposition was inserted at the center of the microcosm at 8 cm  
420 depth. For simplicity as well as for its fast decomposition rate, we used a single batch of  
421 commercially available tetrahedron-shaped synthetic tea bags (mesh size of 0.25 mm) containing  
422 2 g of green tea (Lipton, Unilever), as proposed by the “tea bag index” method<sup>20</sup>. Once filled, the

423 microcosms were watered until water could be seen pouring out of the pot. The seedlings were  
424 then manually transplanted to predetermined positions (Fig. 1), depending on the genotype and  
425 treatment. Each laboratory established two blocks of 36 microcosms each, resulting in a total of  
426 72 microcosms per laboratory, with blocks representing two distinct chambers in growth  
427 chamber setups or two distinct growth benches in the same glasshouse.

#### 428 **Soils**

429 All laboratories using growth chamber setups used the same soil, whereas the laboratories using  
430 glasshouses used different soils (see Supplementary Table 1 for the physicochemical properties  
431 of the soils). The soil used in growth chambers was classified as a nutrient-poor cambisol and  
432 was collected from the top layer (0–20 cm) of a natural meadow at the Centre de Recherche en  
433 Ecologie Expérimentale et Prédictive—CEREEP (Saint-Pierre-Lès-Nemours, France). Soils used  
434 in glasshouses originated from different locations. The soil used by laboratory L2 was a fluvisol  
435 collected from the top layer (0–40 cm) of a quarry site near Avignon, in the Rhône valley,  
436 Southern France. The soil used by laboratory L4 was collected from near the La Cage field  
437 experimental system (Versailles, France) and was classified as a luvisol. The soil used by labs  
438 L11 and L12 was collected from the top layer (0–20cm) within the haugh of the river Dreisam in  
439 the East of Freiburg, Germany. This soil was classified as an umbric gleysol with high organic  
440 carbon content. The soil from laboratory L14 was classified as a eutric fluvisol and was collected  
441 on the field site of the Jena Experiment, Germany. Prior to the establishment of microcosms, all  
442 soils were air-dried at room temperature for several weeks and sieved with a 2-mm mesh sieve.  
443 A common inoculum was provided to all laboratories to assure that rhizobia specific to *M.*  
444 *truncatula* were present in all soils.

#### 445 **Abiotic environmental conditions**

446 The set points for environmental conditions were 16 h light (at  $300 \mu\text{mol m}^{-2} \text{s}^{-1}$  PAR) and 8h  
447 dark, 20/16°C, 60/70% air RH for day- and night-time, respectively. Different soils (for  
448 glasshouses) and treatments with sand patches likely affected water drainage and  
449 evapotranspiration. The watering protocol was thus based on drying weight relative to weight at  
450 full water holding capacity (WHC). The WHC was estimated based on the weight difference  
451 between the dry weight of the containers and the wet weight of the containers 24 h after  
452 abundant watering (until water was flowing out of the drainage holes in the bottom of each  
453 container). Soil moisture was maintained between 60 and 80% of WHC (i.e. the containers were  
454 watered when the soil water dropped below 60% of WHC and water added to reach 80% of  
455 WHC) during the first 3 weeks after seedling transplantation and between 50 and 70% of WHC  
456 for the rest of the experiment. Microcosms were watered twice a week with estimated WHC  
457 values from two microcosms per treatment. To ensure that the patch/heterogeneity treatments did  
458 not become a water availability treatment, all containers were weighed and brought to 70 or 80%  
459 of WHC every two weeks. This operation was synchronized with within-block randomization.  
460 All 14 experiments were performed between October 2014 and March 2015.

#### 461 **Sampling and analytical procedures**

462 After 80 days, all plants were harvested. Plant shoots were cut at the soil surface, separated by  
463 species, and dried at 60°C for three days. Roots and any remaining litter in the tea bags were  
464 washed out of the soil using a 1-mm mesh sieve and dried at 60°C for three days. Microcosm  
465 evapotranspiration rate was measured before the harvesting as the difference in weight changes  
466 from 70% of WHC after 48 h. Shoot C%, N%,  $\delta^{13}\text{C}$ , and  $\delta^{15}\text{N}$  were measured on pooled shoot  
467 biomass (including seeds) of *B. distachyon* and analyzed at the Göttingen Centre for Isotope  
468 Research and Analysis using a coupled system consisting of an elemental analyzer (NA 1500,

469 Carlo Erba, Milan, Italy) and a gas isotope mass spectrometer (MAT 251, Finnigan, Thermo  
470 Electron Corporation, Waltham, Massachusetts, USA).

#### 471 **Data analysis and statistics**

472 All analyses were done using R version 3.2.4<sup>29</sup>. Data from each laboratory were first  
473 screened individually for outliers, and values that were lower or higher than three times the inter-  
474 quartile range (representing less than 1.7% of the whole dataset) were removed and considered  
475 missing values. We then assessed whether the impact of the presence of legume (LEG) varied  
476 with laboratory (LAB) and the treatment of controlled systematic variability (CSV). This was  
477 tested individually for each response variable (Table 1) with a mixed-effects model using the  
478 “nlme” package<sup>30</sup>. Following the guidelines suggested by Zuur et al. (2009)<sup>31</sup>, we first identified  
479 the most appropriate random structure using a restricted maximum likelihood (REML) approach  
480 and selected the random structure with the lowest Akaike information criterion (AIC). For this  
481 model, CSV and LAB were included as fix factors, experimental block as a random factor, and a  
482 “varIdent” weighting function to correct for heteroscedasticity resulting from more  
483 heteroscedastic data at the LAB and LEG level (R syntax: “model= lme (response variable ~  
484 LEG\*CSV\*LAB, random=~1|block, weights=varIdent (form = ~1|LAB\*LEG)”) (Table 2). As  
485 the LAB and SETUP experimental factors were not fully crossed (i.e. laboratories performed the  
486 experiment only in one type of setup), the two experimental variables could not be included  
487 simultaneously as fixed effects. Therefore, to test for the SETUP effect, we used an additional  
488 complementary model including CSV and SETUP as fix effects and laboratory as a random  
489 factor (R syntax: “model= lme (response variable ~ LEG\*CSV\*SETUP, random=~1|LAB/block,  
490 weights=varIdent (form = ~1|LAB\*LEG)”) (Supplementary Table 3). To test whether the results  
491 were affected by the collinearity among the response variables, the two models also were run on

492 the first (PC1) and second (PC2) principal components the 12 response variables (Fig. 4ab). PCs  
493 were estimated using the “FactoMineR” package<sup>32</sup>, with missing values replaced using a  
494 regularized iterative multiple correspondence analysis<sup>33</sup> in the “missMDA” package<sup>34</sup>. The same  
495 methodology was used to compute a second PCA derived from the net legume effect on the 12  
496 response variables (Supplementary Fig. 4cd). To assess how many laboratories produced results  
497 that were statistically indistinguishable from one another, we applied Tukey’s post-hoc HSD test  
498 in the “multcomp” package to lab-specific estimates of PC1 and PC2 (Table 2).

499 To assess how the CSV treatments affected the among- and within-laboratory variability,  
500 we used the standard deviation (SD) instead of the coefficient of variation, because the net  
501 legume effect contained both positive and negative values. To calculate among- and within-  
502 laboratory SDs, we centered and scaled the raw values using the z-score normalization [ $z\text{-scored}$   
503  $\text{variable} = (\text{raw value} - \text{mean}) / \text{SD}$ ] individually for each of the 12 response variables. Among-  
504 laboratory SD was computed from the mean of the laboratory z-scores for each response  
505 variable, CSV, and SETUP treatments ( $n = 144$ ; 6 CSV levels  $\times$  2 SETUP levels  $\times$  12 response  
506 variables). Within-laboratory SDs were computed from the values measured in the six replicated  
507 microcosms for each CSV and SETUP treatment combination, individually for each response  
508 variable, resulting in a dataset with the same structure as for among-laboratory SDs ( $n = 144$ ; 6  
509 CSV levels  $\times$  2 SETUP levels  $\times$  12 response variables). Some of the 12 response variables were  
510 intrinsically correlated, but most had correlation coefficients  $< 0.5$  (Supplementary Fig. 5) and  
511 were therefore treated as independent variables. To analyze and visualize the relationships  
512 between the SDs calculated from variables with different units, before the calculation of the  
513 among- and within-laboratory SD, the raw values of the 12 response variables were centered and  
514 scaled.

515 The impact of experimental treatments on among- and within-laboratory SD was analyzed  
516 using mixed-effect models, following the same procedure described for the individual response  
517 variables. The model with the lowest AIC included a random slope for the SETUP within each  
518 response variable as well as a “varIdent” weighting function to correct for heteroscedasticity at  
519 the variable level (R syntax: “model= lme (SD ~ CSV\*SETUP, random=~SETUP|variable,  
520 weights=varIdent (form = ~1|variable)) (see also Supplementary Notes). The relationship  
521 between within- and among-laboratory SD also was tested with a model with similar random  
522 structure but with among-laboratory SD as a dependent variable and within-laboratory SD, CSV  
523 and SETUP as predictors.

524 Because the treatments containing genotypic CSV increased reproducibility in growth  
525 chambers, but slightly increased within-laboratory SD, we also examined the effect of adding  
526 CSV on the statistical power for detecting the net legume effect in each individual laboratory.  
527 This analysis was done with the “power.anova.test” function in the “base” package. We  
528 computed the statistical power of detecting a significant net legume effect (if one had used a one-  
529 way ANOVA for the legume treatment) for CTR, GEN<sub>W</sub>, GEN<sub>A</sub> and ENV<sub>W</sub>+GEN<sub>W</sub> treatments  
530 for each laboratory and response variable. This allowed us to calculate the average statistical  
531 power for the aforementioned treatments and how many additional replicates would have been  
532 needed to achieve the same statistical power as we had in the CTR.

533 The data that support the findings of this study are available from the corresponding author  
534 upon reasonable request.

### 535 **Additional References for methods**

536 29. R Development Core Team. R: a language and environment for statistical computing. R  
537 Foundation for Statistical Computing, Vienna, Austria. (2017).

- 538 30. Pinheiro, J., Bates, D., DebRoy, S. & Sarkar, D. NLME: Linear and nonlinear mixed-  
539 effects models. *R Packag. version 3.1-122*, <http://CRAN.R-project.org/package=nlme> 1–  
540 336 (2016).
- 541 31. Zuur, A. F., Ieno, E. N., Walker, N., Saveliev, A. a & Smith, G. M. *Mixed-effects Models*  
542 *and Extension in Ecology with R*. (2009).
- 543 32. Lê, S., Josse, J. & Husson, F. FactoMineR: An R package for multivariate analysis. *J.*  
544 *Stat. Softw.* **25**, 1–18 (2008).
- 545 33. Josse, J., Chavent, M., Liquet, B. & Husson, F. Handling missing values with regularized  
546 iterative multiple correspondance analysis. *J. Classif.* **29**, 91–116 (2010).
- 547 34. Josse, J. & Husson, F. missMDA : A package for handling missing values in multivariate  
548 data analysis. *J. Stat. Softw.* **70**, 1–31 (2016).



549 **Table 1 | Impact of experimental treatments on response variables.** Mixed-effects model outputs summarizing the impacts of the  
 550 presence of legumes (LEG), controlled systematic variability (CSV) and laboratory (LAB) on the 12 response variables. We also  
 551 present the impact of experimental treatments on the first and second principal components (PC1 and PC2) of all 12 response  
 552 variables. The response variables we measured are a typical ensemble of variables measured in plant-soil microcosm experiments (BM  
 553 = biomass). † symbol indicates response variables measured for the grass *B. distachyon* only, whereas the rest of the variables were  
 554 measured at the microcosm level, i.e. including the contribution of both the legume and the grass species. Stars indicate P-values (\*\*\*)  
 555 for  $P < 0.001$ ; \*\* for  $P < 0.01$ ; \* for  $P < 0.05$ ; + for  $P < 0.1$ ; ns for  $P > 0.1$ ). DF = numerator degrees of freedom.

556

557

|             | DF | Shoot BM      | Root BM                             | Seed BM†                            | Total BM      | Shoot/Root    | Grass height† | Shoot N%†     |
|-------------|----|---------------|-------------------------------------|-------------------------------------|---------------|---------------|---------------|---------------|
| LEG         | 1  | 4602.95 (***) | 1131.64 (***)                       | 2186.64 (***)                       | 1022.28 (***) | 1137.01 (***) | 3.33 (+)      | 366.73 (ns.)  |
| CSV         | 5  | 15.57 (***)   | 23.93 (***)                         | 58.01 (***)                         | 2.70 (*)      | 23.98 (***)   | 23.36 (***)   | 0.81 (ns.)    |
| LAB         | 13 | 1088.67 (***) | 182.53 (***)                        | 364.57 (***)                        | 1279.70 (***) | 183.42 (***)  | 317.33 (***)  | 350.91 (***)  |
| LEG×CSV     | 5  | 23.63 (***)   | 4.48 (***)                          | 33.61 (***)                         | 5.69 (***)    | 4.51 (***)    | 2.62 (*)      | 1.52 (ns)     |
| LEG×LAB     | 13 | 235.99 (***)  | 40.58 (***)                         | 78.17 (***)                         | 126.70 (***)  | 40.38 (***)   | 49.89 (***)   | 14.56 (***)   |
| CSV×LAB     | 65 | 6.54 (***)    | 3.14 (***)                          | 6.93 (***)                          | 7.15 (***)    | 3.16 (***)    | 10.16 (***)   | 1.97 (***)    |
| LEG×LAB×CSV | 65 | 2.22 (***)    | 1.12 (ns.)                          | 2.70 (***)                          | 1.14 (ns.)    | 1.11 (ns.)    | 1.45 (*)      | 1.69 (***)    |
|             |    | n = 1005      | n = 989                             | n = 997                             | n = 976       | n = 987       | n = 1008      | n = 939       |
|             | DF | Shoot C%†     | Shoot $\delta^{15}\text{N}^\dagger$ | Shoot $\delta^{13}\text{C}^\dagger$ | ET            | Litter        | PC1           | PC2           |
| LEG         | 1  | 105.10 (***)  | 14.42 (***)                         | 35.10 (***)                         | 1087.32 (***) | 1.81 (ns.)    | 1229.11 (***) | 1005.88 (***) |
| CSV         | 5  | 0.20 (ns.)    | 8.84 (***)                          | 63.40 (***)                         | 20.13 (***)   | 1.05 (ns.)    | 12.86 (***)   | 22.37 (***)   |
| LAB         | 1  | 175.31 (***)  | 258.29 (***)                        | 577.80 (***)                        | 724.39 (***)  | 117.34 (***)  | 921.87 (***)  | 516.00 (***)  |

|             |   |             |             |            |              |            |              |             |
|-------------|---|-------------|-------------|------------|--------------|------------|--------------|-------------|
| LEG×CSV     | 5 | 2.60 (*)    | 6.48 (***)  | 5.30 (***) | 4.73 (***)   | 1.77 (ns.) | 46.99 (***)  | 11.74 (***) |
| LEG×LAB     | 1 | 11.90 (***) | 16.78 (***) | 2.30 (**)  | 169.18 (***) | 2.05 (*)   | 117.85 (***) | 28.02 (***) |
| CSV×LAB     | 5 | 1.70 (**)   | 4.39 (***)  | 4.10 (***) | 20.54 (***)  | 2.97 (***) | 7.20 (***)   | 2.77 (***)  |
| LEG×LAB×CSV | 5 | 1.32 (+)    | 1.84 (***)  | 1.01 (ns.) | 1.37 (*)     | 1.17 (ns.) | 0.94 (ns.)   | 1.65 (**)   |
|             |   | n = 940     | n = 963     | n = 973    | n = 930      | n = 974    | n = 1008     | n = 1008    |

---

559 **Table 2 | Impact of experimental treatments on the number of laboratories that reproduced the**  
560 **same finding.** Numbers represent the total number of statistically indistinguishable laboratories based  
561 on a Tukey's post-hoc Honest Significant Difference test of the first (PC1) and second (PC2) principal  
562 components of the net legume effect of the 12 response variables (see Supplementary Fig. 4cd for the  
563 PCA results). For a detailed description of experimental treatments and abbreviations see Fig. 1.  
564

| Source                             | All laboratories<br>(n = 14) |     | Glasshouses<br>(n = 6) |     | Growth chambers<br>(n = 8) |     |
|------------------------------------|------------------------------|-----|------------------------|-----|----------------------------|-----|
|                                    | PC1                          | PC2 | PC1                    | PC2 | PC1                        | PC2 |
| CTR                                | 7                            | 11  | 3                      | 5   | 5                          | 5   |
| ENV <sub>W</sub>                   | 10                           | 9   | 3                      | 3   | 6                          | 6   |
| ENV <sub>A</sub>                   | 8                            | 8   | 3                      | 4   | 6                          | 6   |
| GEN <sub>W</sub>                   | 8                            | 10  | 3                      | 3   | 6                          | 7   |
| GEN <sub>A</sub>                   | 11                           | 10  | 3                      | 3   | 7                          | 8   |
| ENV <sub>W</sub> +GEN <sub>W</sub> | 11                           | 10  | 4                      | 3   | 7                          | 7   |

565

566

567 **Figures**

568 **Fig. 1 | Experimental design of one block.** Grass monocultures of *Brachypodium distachyon* (green  
569 shades) and grass-legume mixtures with the legume *Medicago truncatula* (orange-brown shades) were  
570 established in 14 laboratories; shades of green and orange-brown represent three distinct genotypes of  
571 *B. distachyon* (Bd21, Bd21-3 and Bd3-1) and *M. truncatula* (L000738, L000530 and L000174). Plants  
572 were established in a substrate with equal proportions of sand (black spots) and soil (white), with the  
573 sand being either mixed with the soil or concentrated in sand patches to induce environmental  
574 controlled systematic variability (CSV). Combinations of three distinct genotypes were used to  
575 establish genotypic CSV. Alongside a control (CTR) with no CSV and containing one genotype  
576 (L000738 and/or Bd21) in a homogenized substrate (soil-sand mixture), five different types of  
577 environmental or genotypic CSV were used as treatments: 1) within-microcosm environmental CSV  
578 (ENV<sub>W</sub>) achieved by spatially varying soil resource distribution through the introduction of six sand  
579 patches into the soil; 2) among-microcosm environmental CSV (ENV<sub>A</sub>), which varied the number of  
580 sand patches (none, three or six) among replicate microcosms; 3) within-microcosm genotypic CSV  
581 (GEN<sub>W</sub>) that used three distinct genotypes per species planted in homogenized soil in each microcosm;  
582 4) among-microcosm genotypic CSV (GEN<sub>A</sub>) that varied the number of genotypes (one, two or three)  
583 planted in homogenized soil among replicate microcosms; and 5) both genotypic and environmental  
584 CSV (GEN<sub>W</sub>+ENV<sub>W</sub>) within microcosms that used six sand patches and three plant genotypes per  
585 species in each microcosm. The “× 3” indicates that the same genotypic and sand composition was  
586 repeated in three microcosms per block. The spatial arrangement of the microcosms in each block was  
587 re-randomized every two weeks. The blocks represent two distinct chambers in growth chamber  
588 setups, whereas in glasshouse setups the blocks represent two distinct growth benches in the same  
589 glasshouse.

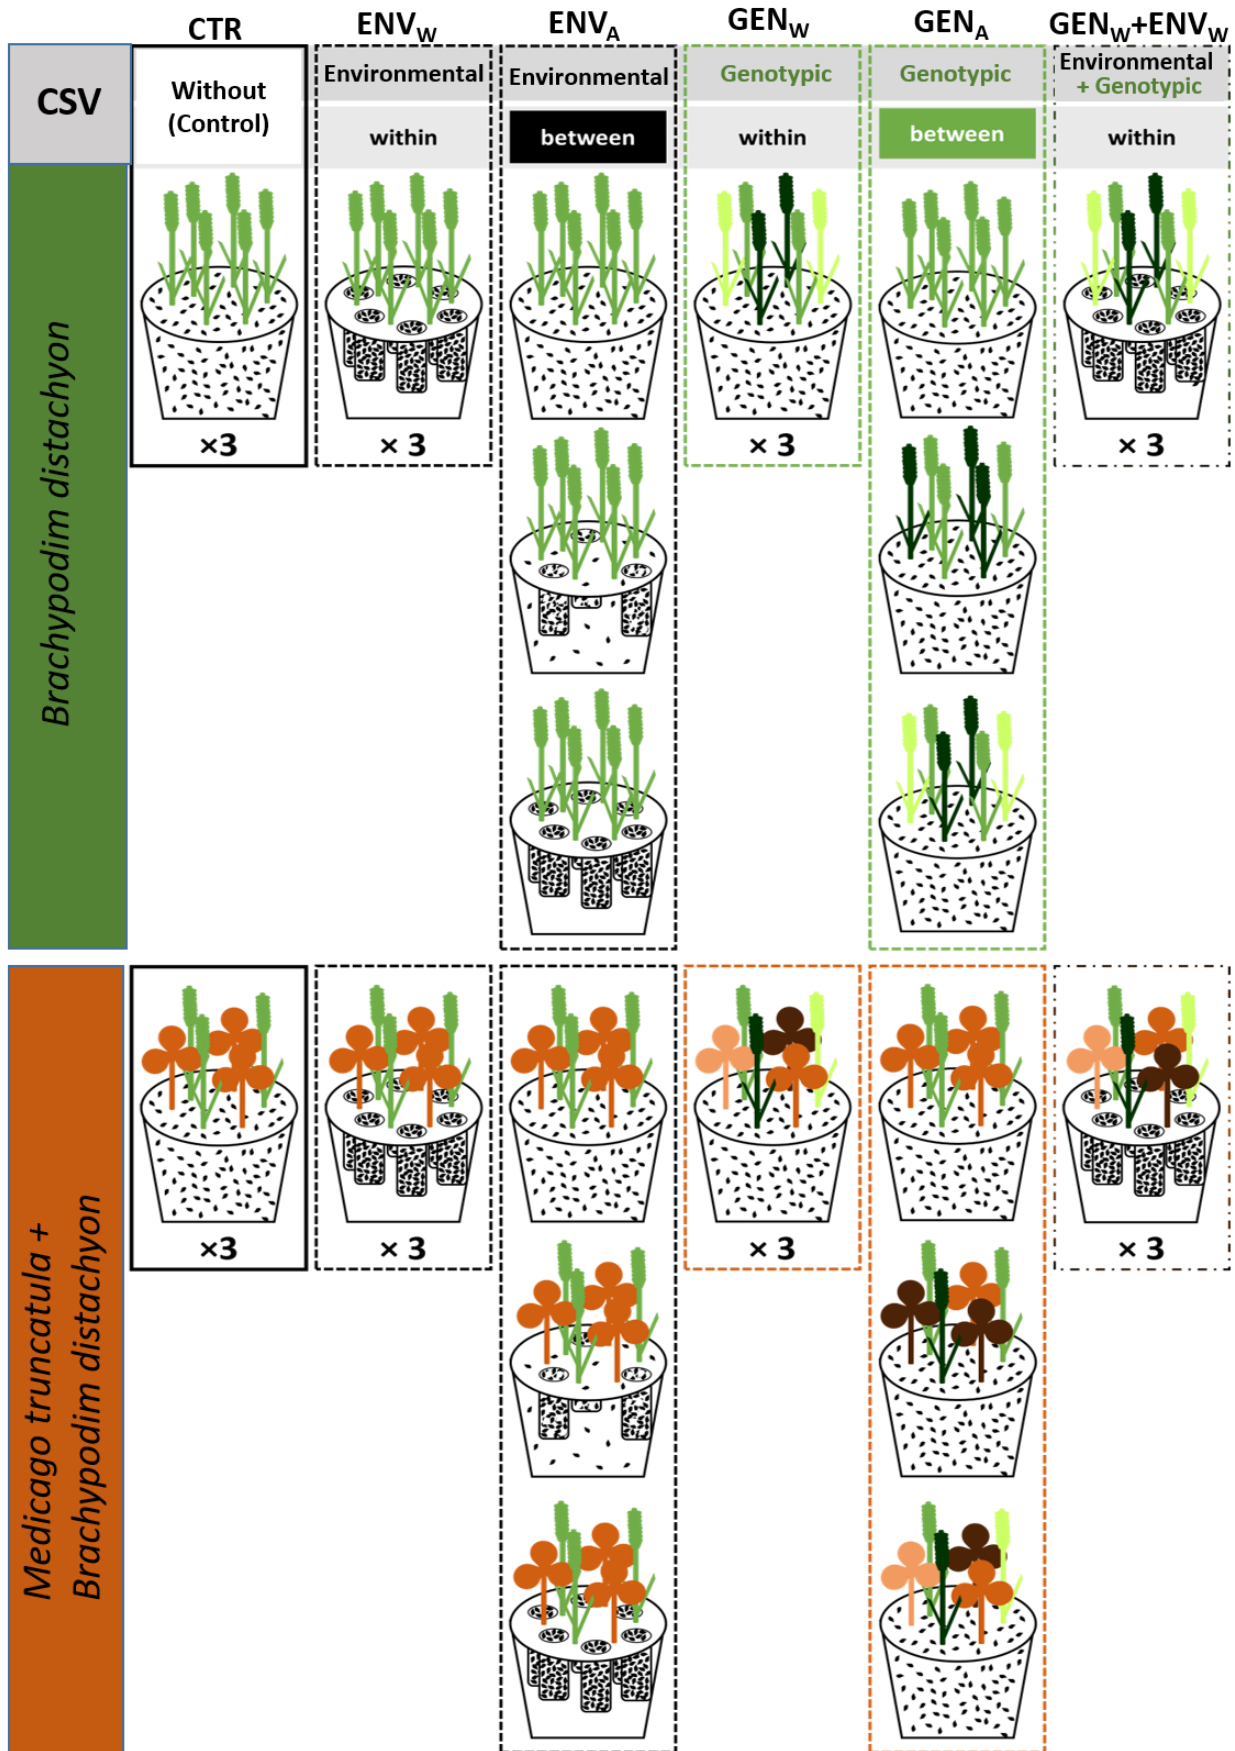

591 **Fig. 2 | Net legume effect for the 12 response variables in 14 laboratories as affected by**  
592 **laboratory and SETUP (growth chamber vs. glasshouse) treatment.** The grey and blue bars  
593 represent laboratories that used growth chamber and glasshouse set-ups, respectively. Bars show  
594 means by laboratory obtained by averaging over all CSV treatments, with error bars indicating  $\pm 1$   
595 s.e.m. (n = 72 microcosms per laboratory).

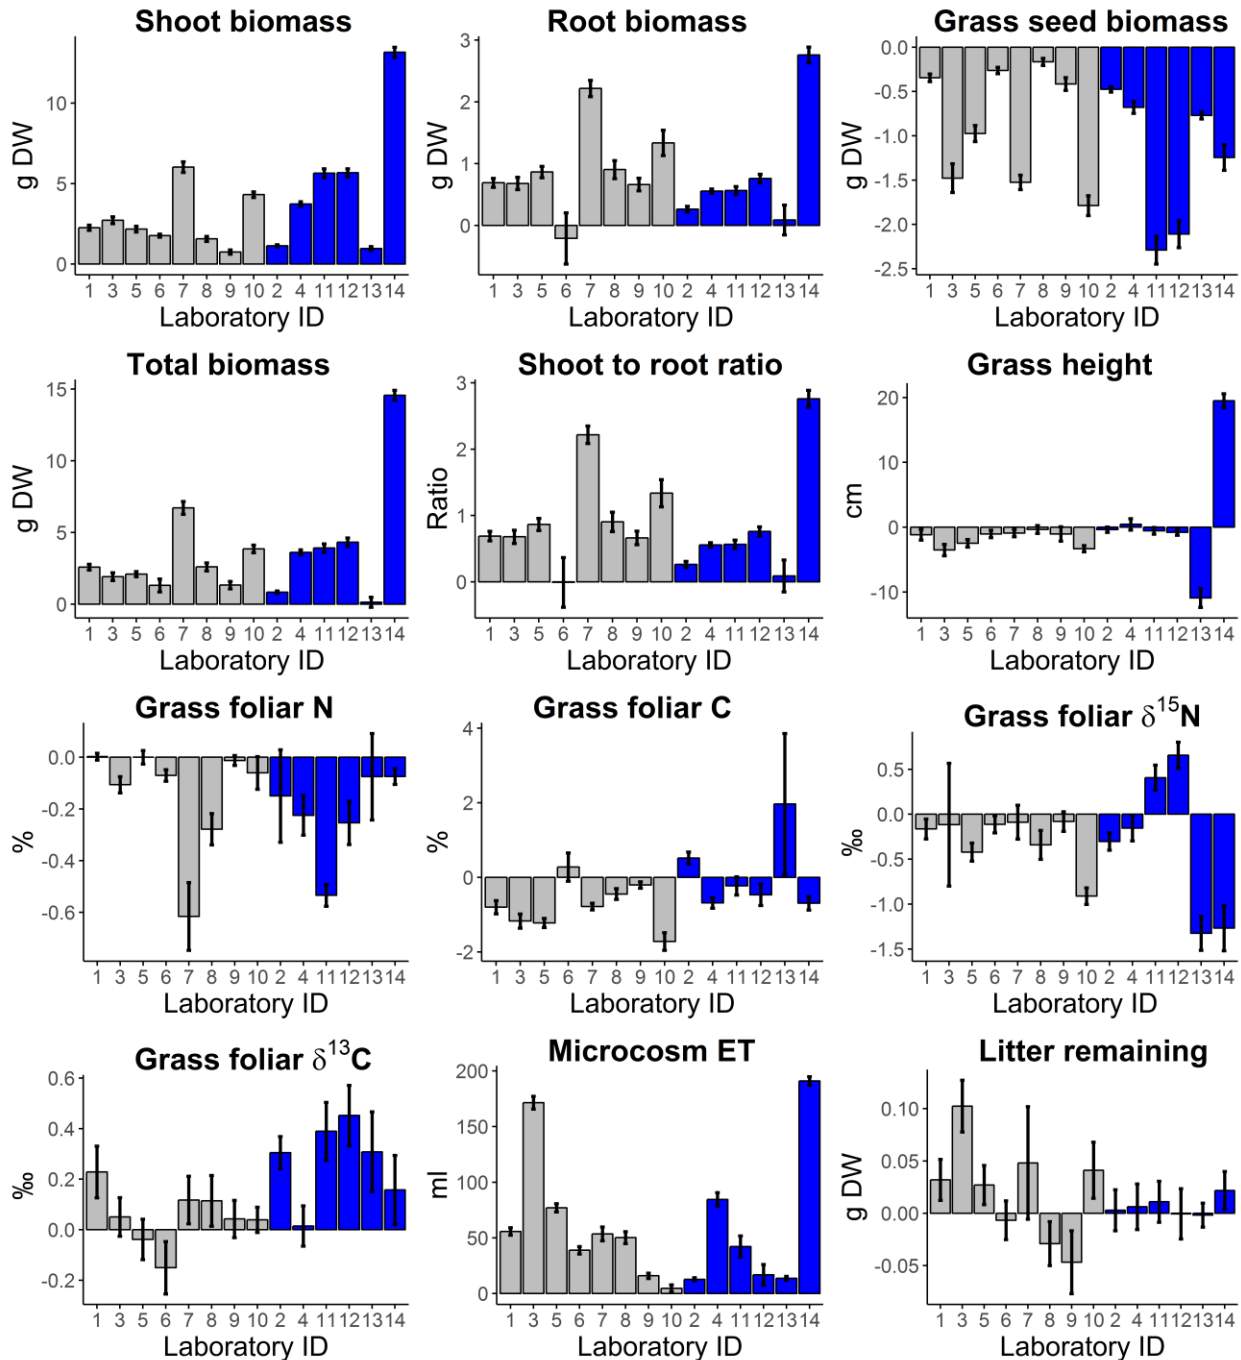

596

597 **Fig. 3 | Among- and within-laboratory standard deviation (SD) of the net legume effect as**  
 598 **affected by experimental treatments.** Among-laboratory SD as affected by CSV and SETUP (a) and  
 599 SETUP only (b). Within-laboratory SD as affected by CSV and SETUP (c) and SETUP only (d).  
 600 Lower among-laboratory SD indicates enhanced reproducibility. Solid-filled bars and striped bars  
 601 represent glasshouse (n = 6) and growth chamber setups (n = 8), respectively. Stars represent *P*-values  
 602 (\*\*\* for  $P < 0.001$ , \*\* for  $P < 0.01$ , \* for  $P < 0.05$ ) indicating significantly different fitted coefficients  
 603 according to the mixed-effects models (see Supplementary Notes for full model outputs); in (c) the star  
 604 indicates the significant difference between GEN<sub>A</sub> and CTR, irrespective of the type of SETUP. For a  
 605 detailed description of experimental treatments and abbreviations see Fig. 1.

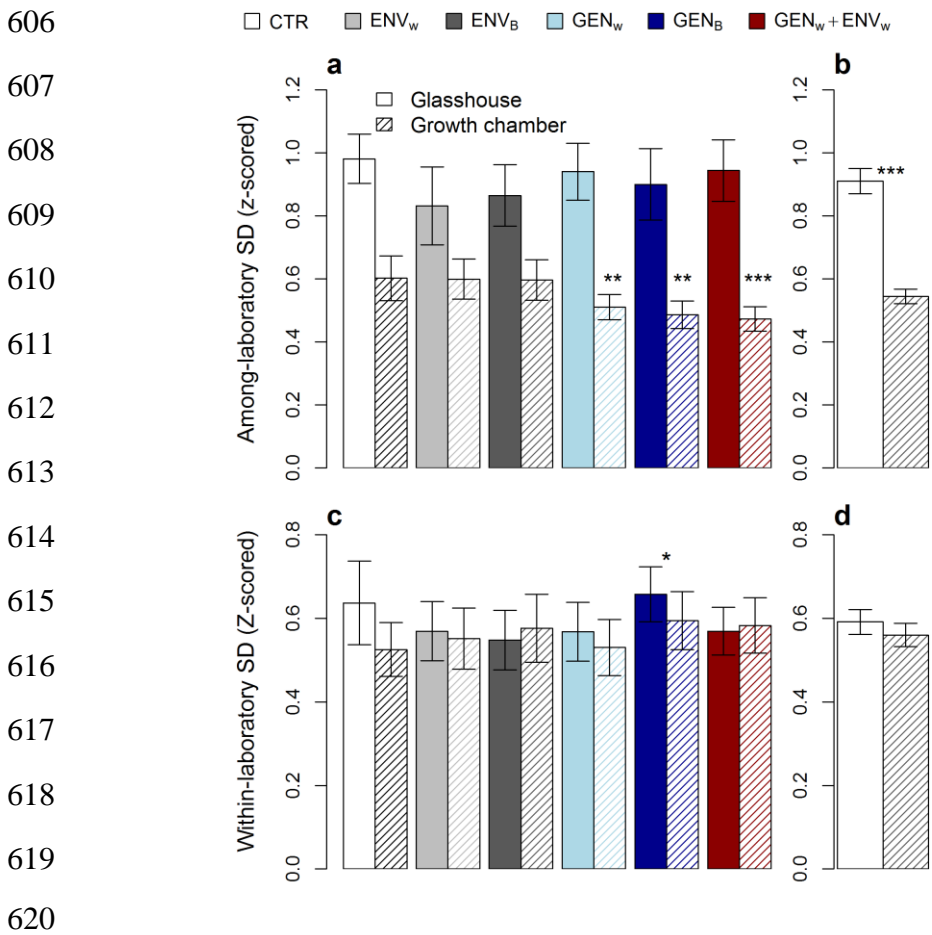

621 **Fig. 4 | Relationship between within-laboratory SD and among-laboratory SD of the net legume**  
622 **effect as affected by experimental treatments.** The figure illustrates the significant within-laboratory  
623 SD×SETUP×CSV three-way interaction ( $F_{5,109} = 2.4$ ,  $P < 0.040$ ) affecting among-laboratory SD  
624 (Supplementary Note). This interaction is the result of a more negative relationship between within-  
625 and among-laboratory SD in glasshouses relative to growth chambers, but with different slopes for the  
626 different CSV treatments. Points represent the 12 response variables. Stars represent  $P$  values  $< 0.05$   
627 for the individual linear regressions. Note the different scale for the y-axis between growth chambers  
628 and glasshouses. For a detailed description of experimental treatments and abbreviations see Fig. 1.

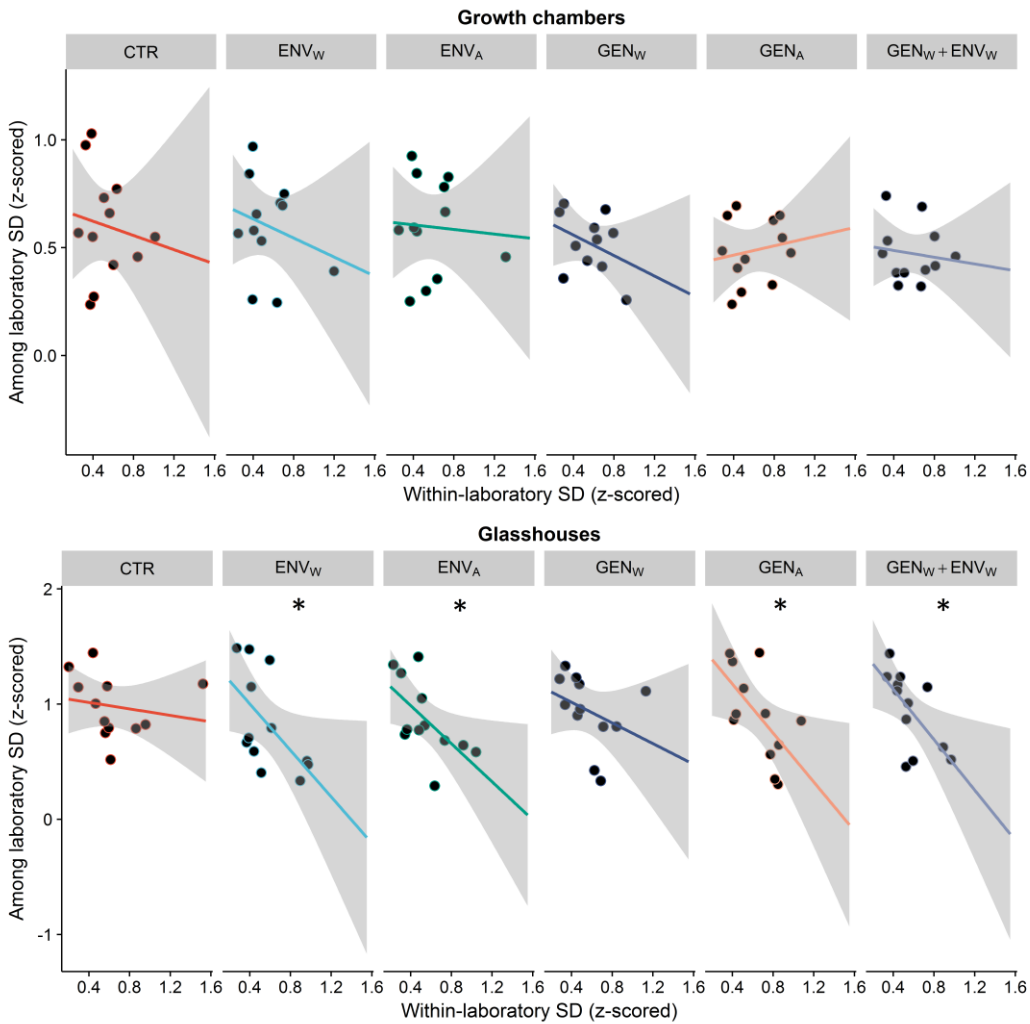

629
